# Supplementary material for: Voluntary modulation of mental effort investment: an fMRI study
Source: PubMed Central journal article supplement (PMC5722925; doi:10.1038/s41598-017-17519-3), 2017-12-08
Supplement: 41598_2017_17519_MOESM1_ESM.pdf [file 41598_2017_17519_MOESM1_ESM.pdf]

# Voluntary modulation of mental effort investment: an fMRI study

Omar T. Khachouf<sup>1</sup>, Gang Chen<sup>2</sup>, Davide Duzzi<sup>1</sup>, Carlo A.  
Porro<sup>1,3</sup>, and Giuseppe Pagnoni<sup>1,3,\*</sup>

<sup>1</sup>Department of Biomedical, Metabolic and Neural Sciences,  
University of Modena and Reggio Emilia, Modena, 41125, Italy

<sup>2</sup>Scientific and Statistical Computing Core, National Institute  
of Mental Health, National Institutes of Health, Bethesda,  
MD, 20892, USA

<sup>3</sup>Center for Neuroscience and Neurotechnology, University of  
Modena and Reggio Emilia, Modena, 41125, Italy

\*Corresponding author: [giuseppe.pagnoni@unimore.it](mailto:giuseppe.pagnoni@unimore.it)

September 21, 2017

## Supplementary Information

### NASA-TLX rating instrument

The NASA-TLX is a psychometric instrument assessing the subjective perception of task workload. It consists of six subscales, which were explained to the volunteers according to the following description:

**Mental Demand** How hard was the task mentally?

**Physical Demand** How hard was the task physically?

**Temporal Demand** How much time pressure did you feel due to the pace at which stimuli were presented?

**Performance** How successful do you think you were in performing the task correctly?

**Effort** How hard did you have to work to perform the task?

**Frustration Level** How insecure, discouraged, irritated, stressed and annoyed did the task make you feel?

Note that in the TLX instrument the Performance subscale is displayed graphically with high scores indicating *poor* performance: this is to maintain consistency with the other subscales (tasks with a higher mental workload are usually associated with poorer performance). In order to avoid confusion, in the figures and tables the subscale was relabeled as ‘negPerform’ (*i.e.* negative performance, where a high score indicates a subjective perception of *poor* performance). The mean EXR-RLX differences in the TLX scores, and their associated statistics, are reported in Table S1.

| TLX subscale      | EXR-RLX | $t(44)$ | $p$ -value              |
|-------------------|---------|---------|-------------------------|
| Mental Demand     | 1.24    | 6.27    | $1.37 \times 10^{-7*}$  |
| Physical Demand   | 0.18    | 1.30    | 0.20                    |
| Temporal Demand   | 0.29    | 2.09    | 0.042                   |
| negPerformance    | -0.48   | -1.88   | 0.067                   |
| Effort            | 2.72    | 9.97    | $7.28 \times 10^{-13*}$ |
| Frustration Level | 0.73    | 3.24    | 0.0023*                 |

Table S1: Effect of endogenous effort modulation on various dimensions of perceived task workload (NASA-TLX instrument). The Performance subscale has been relabeled as ‘negPerformance’, to remind the reader that its scores are high for ratings of poor performance. Statistical values refer to a paired two-sample t-test, and are not Bonferroni-corrected. The tests marked with an asterisk remain significant at  $\alpha < 0.005$  after Bonferroni correction.

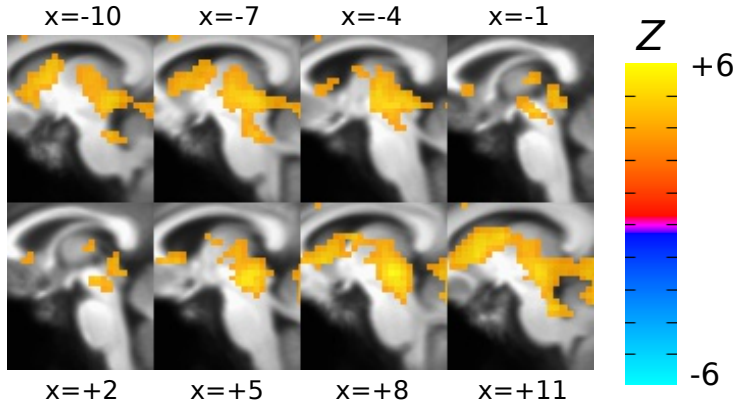

Figure S1: Activation map from the cueEXR-cueRLX contrast, where the brain stem activation is shown in greater detail.

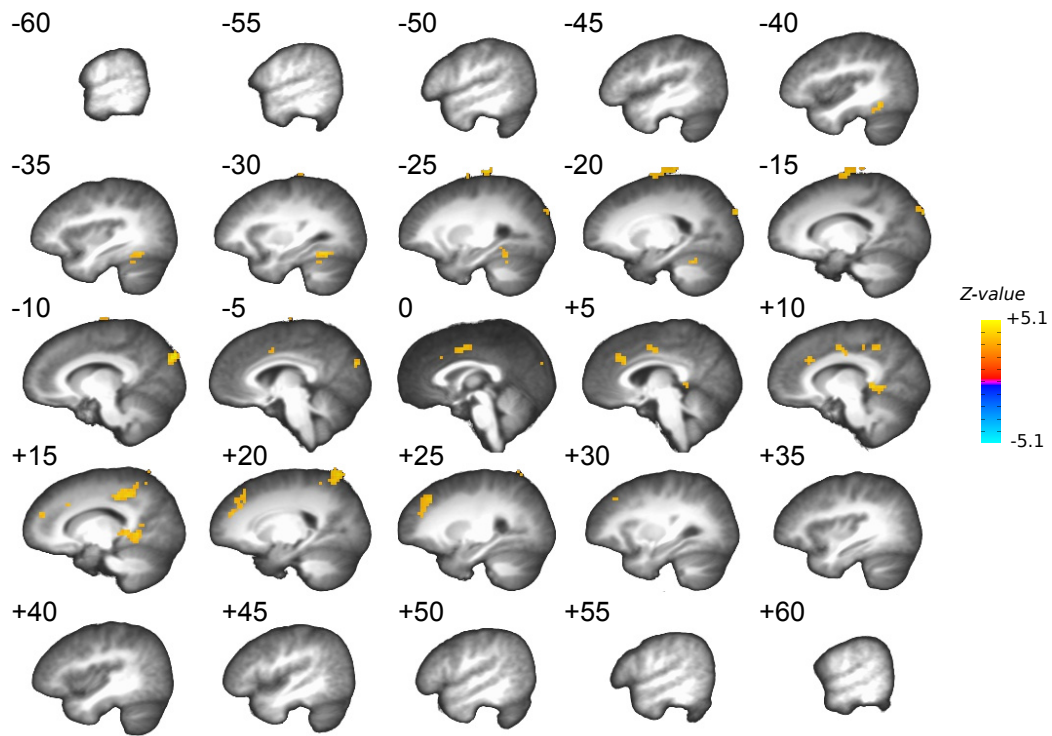

Figure S2: Activation map from the whole-brain correlation analysis between the individual EXR-RLX HR changes and the cueEXR-cueRLX BOLD response. The numbers reported in the top-left corner of each slice identify its  $x$  coordinate.

| <b>Region</b>               | <b>Size</b> | <b>x</b> | <b>y</b> | <b>z</b> |
|-----------------------------|-------------|----------|----------|----------|
| <i>Positive Activations</i> |             |          |          |          |
| L lingual/fusiform gyr      | 3           | -11.5    | -62.5    | -9.5     |
| <i>Negative Activations</i> |             |          |          |          |
| L lat parietal cortex       | 15          | -53.7    | -64.7    | +35.5    |
| R sup frontal gyr           | 14          | +18.0    | +41.8    | +39.4    |
|                             | 2           | +16.5    | +36.0    | +44.5    |
|                             | 2           | +13.5    | +36.0    | +47.5    |

Table S2: Regions whose activity was significantly modulated by both exogenous and endogenous effort (*i.e.* contrasts **EXR-RLX** and **incongr-congr**). Size is reported in voxels ( $3 \times 3 \times 3$  mm), and Talairach coordinates refer to the cluster center of mass. Abbreviations: L/R = left/right, lat = lateral, sup = superior, gyr = gyrus.

| <b>Region</b>         | <b>Size</b> | <b>x</b> | <b>y</b> | <b>z</b> |
|-----------------------|-------------|----------|----------|----------|
| Cerebellum (mostly R) | 198         | +6.3     | -56.7    | -14.6    |
| R occipital pole      | 30          | +19.5    | -86.4    | +7.4     |
| R precuneus           | 19          | +10.3    | -69.6    | +45.1    |
|                       | 4           | +9.0     | -83.2    | +37.8    |

Table S3: Regions whose activity significantly increased, in the **EXR** compared to the **RLX** condition, in response to both the preparatory visual cue for effort engagement and the actual Stroop task execution. Size is reported in voxels ( $3 \times 3 \times 3$  mm), and Talairach coordinates refer to the cluster center of mass. Abbreviations: R = right.
